# Supplementary material for: Microwave Transmittance Technique Using Microstrip Patch Antennas, as a Non-Invasive Tool to Determine Soil Moisture in Rhizoboxes
Source: MDPI journal article supplement (doi:10.3390/s20041166), 2020-02-20
Supplement: s1 [file s1]

## Supplementary Material

In Table 1 of the article, the calculation of the dielectric properties of the test liquids at 25 ° C and  $f = 4.8$  GHz was presented.

Figure S1A–D are showing the dependences of  $S_{21}$  on different parameters, as (A)  $\tan \delta \times S_{21}$  (dB), (B)  $|\epsilon^*| \times S_{21}$  (dB); (C)  $\epsilon' \times S_{21}$  (dB) and (D)  $\epsilon'' \times S_{21}$  (dB).

In Figure 7 of the paper the selected parameter is presented, which was considered the most suitable for this type of measurements.

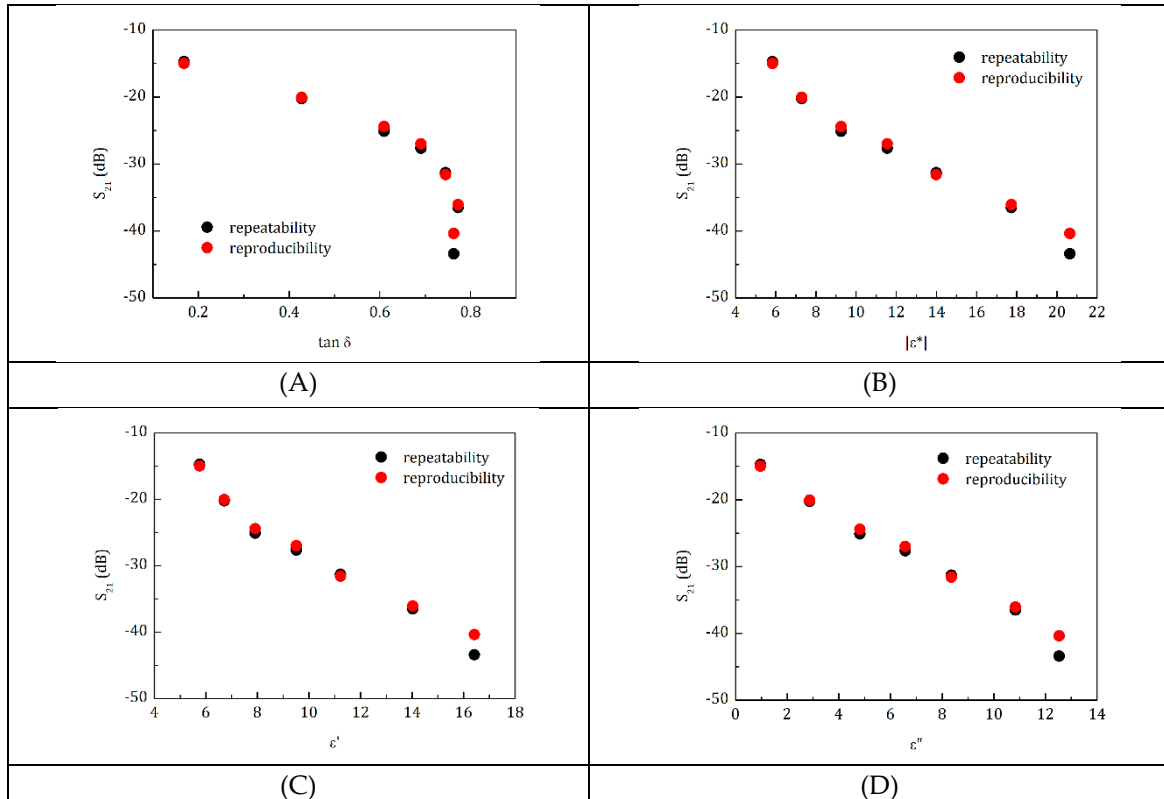

**Figure S1.** The graphic that showing the dependences of  $S_{21}$  on different parameters, as A)  $\tan \delta \times S_{21}$  (dB), (B)  $|\epsilon^*| \times S_{21}$  (dB); (C)  $\epsilon' \times S_{21}$  (dB) and (D)  $\epsilon'' \times S_{21}$  (dB).
